# Supplementary material for: Multi-cooperation of soil biota in the plough layer is the key for conservationtillage to improve N availability and crop yield
Source: Copernicus journal article supplement (doi:10.5194/soil-2020-2), 2020-02-10
Supplement: Supplementary file 1 [file soil-2020-2-supplement.pdf]

1 **Supplementary materials**

2 **Table S1** Soil bulk density (g cm<sup>-3</sup>) and monthly soil temperature (°C) under different tillage practices during the growing season of soybean.

3

4

5

6

7

8

9

10

11

12

13

14

15

16

17

18

| Treatment |    | Soil temperature (°C) |                  |       |       |        |           | Soil bulk density (g cm <sup>-3</sup> ) |                  |        |                   |        |                        |
|-----------|----|-----------------------|------------------|-------|-------|--------|-----------|-----------------------------------------|------------------|--------|-------------------|--------|------------------------|
|           |    | April                 | May <sup>a</sup> | June  | July  | August | September | April                                   | May <sup>a</sup> | June   | July <sup>a</sup> | August | September <sup>a</sup> |
| 0–5 cm    | CT | 11.6                  | 17.0             | 22.4  | 25.2  | 21.6   | 15.7      | 1.06                                    | 1.08             | 1.15   | 1.25              | 1.36   | 1.42                   |
|           |    | (0.3)                 | (0.5)            | (0.7) | (1.0) | (0.2)  | (0.3)     | (0.07)                                  | (0.02)           | (0.04) | (0.02)            | (0.05) | (0.03)                 |
|           | RT | 10.7                  | 16.1             | 21.5  | 23.6  | 21.3   | 16.0      | 1.00                                    | 1.05             | 1.10   | 1.16              | 1.22   | 1.27                   |
|           |    | (0.3)                 | (0.6)            | (0.9) | (0.3) | (0.2)  | (0.2)     | (0.04)                                  | (0.02)           | (0.04) | (0.05)            | (0.06) | (0.02)                 |
|           | NT | 9.0                   | 15.0             | 21.0  | 23.3  | 21.1   | 15.8      | 0.96                                    | 1.09             | 1.11   | 1.19              | 1.23   | 1.28                   |
|           |    | (0.7)                 | (0.7)            | (0.8) | (0.4) | (0.2)  | (0.4)     | (0.05)                                  | (0.03)           | (0.03) | (0.05)            | (0.06) | (0.01)                 |
| 5–15 cm   | CT | 9.5                   | 15.6             | 21.7  | 24.5  | 21.6   | 16.1      | 1.11                                    | 1.13             | 1.14   | 1.22              | 1.30   | 1.30                   |
|           |    | (0.3)                 | (0.4)            | (0.5) | (0.9) | (0.3)  | (0.5)     | (0.08)                                  | (0.07)           | (0.07) | (0.05)            | (0.04) | (0.01)                 |
|           | RT | 8.7                   | 14.7             | 20.7  | 22.8  | 21.0   | 16.9      | 1.23                                    | 1.25             | 1.26   | 1.33              | 1.38   | 1.40                   |
|           |    | (0.3)                 | (0.3)            | (0.7) | (0.9) | (1.3)  | (1.2)     | (0.01)                                  | (0.01)           | (0.02) | (0.01)            | (0.02) | (0.02)                 |
|           | NT | 6.6                   | 13.6             | 20.5  | 22.6  | 21.0   | 15.7      | 1.27                                    | 1.32             | 1.30   | 1.37              | 1.42   | 1.42                   |
|           |    | (0.8)                 | (0.6)            | (0.8) | (0.4) | (0.2)  | (0.3)     | (0.03)                                  | (0.05)           | (0.03) | (0.04)            | (0.03) | (0.02)                 |

19 CT, conventional tillage; RT, ridge tillage; NT, no tillage; <sup>a</sup> indicates the value was calculated by linear interpolation from the sampled months.

20 **Table S2** Physiological parameter values<sup>1</sup> for the soil biota.

21

| Functional group |                     | $P_e$ (C/C) | $A_e$ (C/C) | $a$   | $b$  | $T$ (°C) | Body C:N ratio |
|------------------|---------------------|-------------|-------------|-------|------|----------|----------------|
| Microbes         | Bacteria            | 0.30        | 1.00        | -     | -    | -        | 5              |
|                  | Fungi               | 0.30        | 1.00        | -     | -    | -        | 10             |
| Nematodes        | Bacterivores        | 0.37        | 0.60        | 29.25 | 0.72 | 20       | 10             |
|                  | Fungivores          | 0.37        | 0.38        | 29.25 | 0.72 | 20       | 10             |
|                  | Plant-parasites     | 0.37        | 0.25        | 29.25 | 0.72 | 20       | 10             |
|                  | Omnivores-predators | 0.37        | 0.50        | 29.25 | 0.72 | 20       | 10             |
| Mites            | Fungivores          | 0.35        | 0.50        | 7.2   | 0.69 | 10       | 8              |
|                  | Predators           | 0.35        | 0.60        | 102   | 0.87 | 10       | 8              |
| Collembolans     | Fungivores          | 0.35        | 0.50        | 63    | 0.73 | 18       | 8              |
|                  | Predators           | 0.35        | 0.50        | 63    | 0.73 | 18       | 8              |

22 <sup>1</sup>, source from Didden et al. (1994) and de Ruiter et al. (1993).

23  $P_e$ , production efficiency.

24  $A_e$ , assimilation efficiency.

25  $a$  and  $b$ , constants for the respiration equation  $Q = aW^b$  (see text); the constants presuppose  $Q$  (oxygen consumption rate) as  $O_2 \mu\text{L ind.}^{-1} \text{h}^{-1}$ .

26  $T$ , temperature at which  $a$  and  $b$  were determined.

27

28

29 **Table S3** Food preferences (percentage)\* for the different taxonomic groups of soil biota.

30

| Food source                         | Bacteria | Fungi | Nematodes    |            |                 |                     | Mites      |           | Collembolans |           |
|-------------------------------------|----------|-------|--------------|------------|-----------------|---------------------|------------|-----------|--------------|-----------|
|                                     |          |       | Bacterivores | Fungivores | Plant-parasites | Omnivores-predators | Fungivores | Predators | Fungivores   | Predators |
| Root (C:N = 7.5) <sup>a</sup>       | -        | -     | -            | 20         | 100             | 10                  | -          | -         | -            | -         |
| Detritus (C:N = 13/11) <sup>b</sup> | 100      | 100   | -            | -          | -               | -                   | -          | -         | -            | -         |
| Bacteria (C:N = 5)                  | -        | -     | 95           | -          | -               | 65                  | -          | -         | -            | -         |
| Fungi (C:N =10)                     | -        | -     | -            | 80         | -               | -                   | 100        | -         | 100          | -         |
| Protists (C:N = 5)                  | -        | -     | 5            | -          | -               | 5                   | -          | -         | -            | -         |
| Nematodes (C:N = 10)                | -        | -     | -            | -          | -               | 20                  | -          | 25        | -            | 100       |
| Collembolans (C:N = 8)              | -        | -     | -            | -          | -               | -                   | -          | 75        | -            | -         |
| Food C:N ratio <sup>c</sup>         | 14       | 14    | 5            | 9.5        | 7.5             | 6.25                | 10         | 8.5       | 10           | 10        |

31 \*, source from Didden et al. (1994) and de Ruiter et al. (1993).

32 <sup>a</sup>, the C:N ratio of the cytoplasm of plant cells (Verschoor et al., 2002).

33 <sup>b</sup>, measured in our lab, the C:N ratio of detritus of conservation and conventional tillage was 13 and 11, respectively.

34 <sup>c</sup>, calculated following Rashid et al. (2014); Food C:N ratio =  $(\sum \text{foodpreference} \times \text{C:N}_{\text{foodsource}})/100$ .

35

36

37

38

39

40

41 **Table S4** Mean value of soil biotic biomass (expressed as mg C m<sup>-2</sup>) under different tillage practices during the growing season of soybean  
 42 (means (SE), n = 4).

| Functional group        |                     | 0–5 cm            |                   |                   | 5–15 cm           |                   |                   | ANOVA       |           |         |
|-------------------------|---------------------|-------------------|-------------------|-------------------|-------------------|-------------------|-------------------|-------------|-----------|---------|
|                         |                     | CT                | RT                | NT                | CT                | RT                | NT                | Tillage (T) | Depth (D) | T × D   |
| Microbes                | Bacteria            | 1012.9<br>(83.2)  | 1227.9<br>(66.5)  | 1408.6<br>(234.7) | 1499.9<br>(227.0) | 1898.8<br>(220.7) | 2129.9<br>(122.2) | < 0.001     | < 0.001   | ns      |
|                         | Fungi               | 2731.1<br>(218.2) | 3729.2<br>(273.2) | 4441.1<br>(476.8) | 3093.0<br>(401.5) | 3989.7<br>(403.6) | 4361.3<br>(294.8) | < 0.001     | ns        | ns      |
| Nematodes <sup>a</sup>  | Bacterivores        | 7.44<br>(1.54) b  | 22.66<br>(3.84) a | 15.97<br>(4.38) a | 6.32<br>(1.57) c  | 9.76<br>(0.97) b  | 14.19<br>(2.49) a | < 0.001     | < 0.001   | 0.003   |
|                         | Fungivores          | 0.83<br>(0.05) a  | 0.49<br>(0.13) b  | 0.62<br>(0.19) ab | 1.07<br>(0.20) b  | 1.06<br>(0.14) b  | 1.85<br>(0.19) a  | 0.001       | < 0.001   | < 0.001 |
|                         | Plant-parasites     | 4.12<br>(1.8)     | 2.85<br>(0.95)    | 6.02<br>(2.22)    | 9.08<br>(3.10)    | 7.37<br>(3.07)    | 12.04<br>(4.36)   | 0.027       | < 0.001   | ns      |
|                         | Omnivores-predators | 2.54<br>(0.36)    | 2.56<br>(0.67)    | 3.19<br>(0.65)    | 14.00<br>(5.18)   | 11.58<br>(4.42)   | 33.36<br>(10.62)  | 0.018       | < 0.001   | ns      |
| Mites <sup>b</sup>      | Fungivores          | 1.01<br>(0.26) b  | 2.00<br>(0.76) ab | 2.20<br>(0.69) a  | 0.76<br>(0.56) a  | 0.76<br>(0.09) a  | 0.69<br>(0.28) a  | ns          | < 0.001   | 0.049   |
|                         | Predators           | 0.03<br>(0.01) b  | 0.07<br>(0.03) ab | 0.08<br>(0.02) a  | 0.01<br>(0.01) a  | 0.02<br>(0.01) a  | 0.01<br>(0.02) a  | 0.015       | < 0.001   | 0.012   |
| Collembola <sup>b</sup> | Fungivores          | 0.69<br>(0.47)    | 1.16<br>(0.62)    | 1.27<br>(0.42)    | 0.75<br>(0.48)    | 0.48<br>(0.19)    | 0.34<br>(0.08)    | ns          | 0.005     | ns      |

|                      |                   |                   |                    |                     |                   |                   |         |       |       |
|----------------------|-------------------|-------------------|--------------------|---------------------|-------------------|-------------------|---------|-------|-------|
| Predators            | 21.70<br>(4.67) b | 43.57<br>(4.90) a | 36.78<br>(5.32) a  | 23.86<br>(12.34) ab | 26.46<br>(6.57) a | 10.93<br>(6.45) c | 0.013   | 0.001 | 0.006 |
| Total soil organisms | 3782.4<br>(300.3) | 5032.4<br>(298.4) | 5915.9<br>(1499.7) | 4648.8<br>(611.0)   | 5945.9<br>(816.5) | 6564.6<br>(387.0) | < 0.001 | 0.009 | ns    |

43 CT, conventional tillage; RT, ridge tillage; NT, no tillage. Two-way ANOVA was used to test the effect of tillage and soil depth on the variables. When significant  
44 interaction occurred, the pairwise differences between CT and RT and NT were tested with Tukey's honestly significant difference at each soil depth. Means for the  
45 different tillage systems at the same depth and followed by the same lowercase letter are not significantly different ( $P > 0.05$ ).

46 <sup>a</sup>, nematode biomass was calculated as  $W \times 20\% \times 52\%$ , where W is the body fresh biomass, 20% is the conversion factor from fresh biomass to dry biomass and  
47 52% is the C content in dry biomass (Ferris, 2010).

48 <sup>b</sup>, mite and Collembolan biomass were estimated by the dry biomass (D) based on the regression equations according to Hódar (1996) and Douce (1976), respectively.

49 Then the C content in biomass was calculated using an average C content of 48% dry biomass (Berg et al., 1998).

50 **Table S5** The amount of mineral N (expressed as kg N ha<sup>-1</sup>) delivered by different groups of soil biota in different tillage practices during the  
 51 growing season of soybean (means (SE), n = 4).

52

| Functional groups |                      | 0–5 cm             |                    |                    | 5–15 cm            |                    |                    | ANOVA       |           |         |
|-------------------|----------------------|--------------------|--------------------|--------------------|--------------------|--------------------|--------------------|-------------|-----------|---------|
|                   |                      | CT                 | RT                 | NT                 | CT                 | RT                 | NT                 | Tillage (T) | Depth (D) | T × D   |
|                   | Total soil organisms | 87.21<br>(11.18)   | 108.83<br>(9.40)   | 127.46<br>(36.03)  | 92.10<br>(16.05)   | 109.94<br>(14.39)  | 123.62<br>(5.57)   | 0.002       | ns        | ns      |
| Microbe           | Bacteria             | 11.03<br>(1.44)    | 12.47<br>(0.51)    | 14.17<br>(2.52)    | 14.97<br>(2.66)    | 17.41<br>(2.07)    | 19.58<br>(0.74)    | 0.003       | < 0.001   | ns      |
|                   | Fungi                | 74.69<br>(9.81)    | 93.64<br>(9.17)    | 110.95<br>(26.25)  | 75.07<br>(13.71)   | 90.50<br>(12.36)   | 101.44<br>(4.84)   | 0.002       | ns        | ns      |
| Nematode          | Bacterivores         | 0.42<br>(0.10) b   | 1.15<br>(0.18) a   | 0.89<br>(0.22) a   | 0.39<br>(0.08) b   | 0.53<br>(0.06) ab  | 0.73<br>(0.15) a   | < 0.001     | < 0.001   | 0.002   |
|                   | Fungivores           | 0.06<br>(0.01) a   | 0.03<br>(0.01) b   | 0.04<br>(0.02) ab  | 0.07<br>(0.01) b   | 0.06<br>(0.01) b   | 0.11<br>(0.02) a   | < 0.001     | < 0.001   | < 0.001 |
|                   | Plant-parasites      | 0.27<br>(0.08)     | 0.25<br>(0.09)     | 0.44<br>(0.10)     | 0.57<br>(0.13)     | 0.48<br>(0.13)     | 0.65<br>(0.17)     | 0.016       | < 0.001   | ns      |
|                   | Omnivores-predators  | 0.16<br>(0.03) a   | 0.13<br>(0.07) a   | 0.16<br>(0.02) a   | 0.46<br>(0.14) b   | 0.42<br>(0.11) b   | 0.88<br>(0.29) a   | 0.004       | < 0.001   | 0.011   |
| Mite              | Fungivores           | 0.022<br>(0.006)   | 0.039<br>(0.017)   | 0.034<br>(0.009)   | 0.010<br>(0.006)   | 0.011<br>(0.001)   | 0.007<br>(0.003)   | ns          | < 0.001   | ns      |
|                   | Predators            | 0.0009<br>(0.0003) | 0.0022<br>(0.0013) | 0.0020<br>(0.0001) | 0.0003<br>(0.0002) | 0.0003<br>(0.0002) | 0.0002<br>(0.0001) | ns          | < 0.001   | ns      |

|             |            |                  |                  |                  |                  |                  |                  |       |         |       |
|-------------|------------|------------------|------------------|------------------|------------------|------------------|------------------|-------|---------|-------|
| Collembolan | Fungivores | 0.03<br>(0.02) a | 0.06<br>(0.03) a | 0.06<br>(0.02) a | 0.05<br>(0.03) a | 0.03<br>(0.01) a | 0.02<br>(0.01) a | ns    | 0.037   | 0.031 |
|             | Predators  | 0.52<br>(0.12) b | 1.06<br>(0.21) a | 0.72<br>(0.08) b | 0.50<br>(0.15) a | 0.51<br>(0.07) a | 0.21<br>(0.18) b | 0.001 | < 0.001 | 0.003 |

53 CT, conventional tillage; RT, ridge tillage; NT, no tillage. Two-way ANOVA was used to test the effect of tillage and soil depth on the variables. When significant  
54 interaction occurred, the differences between CT and RT and NT were tested with Tukey's honestly significant difference at each soil depth. Means for the different  
55 tillage systems at the same depth and followed by the same lowercase letter are not significantly different ( $P > 0.05$ ).

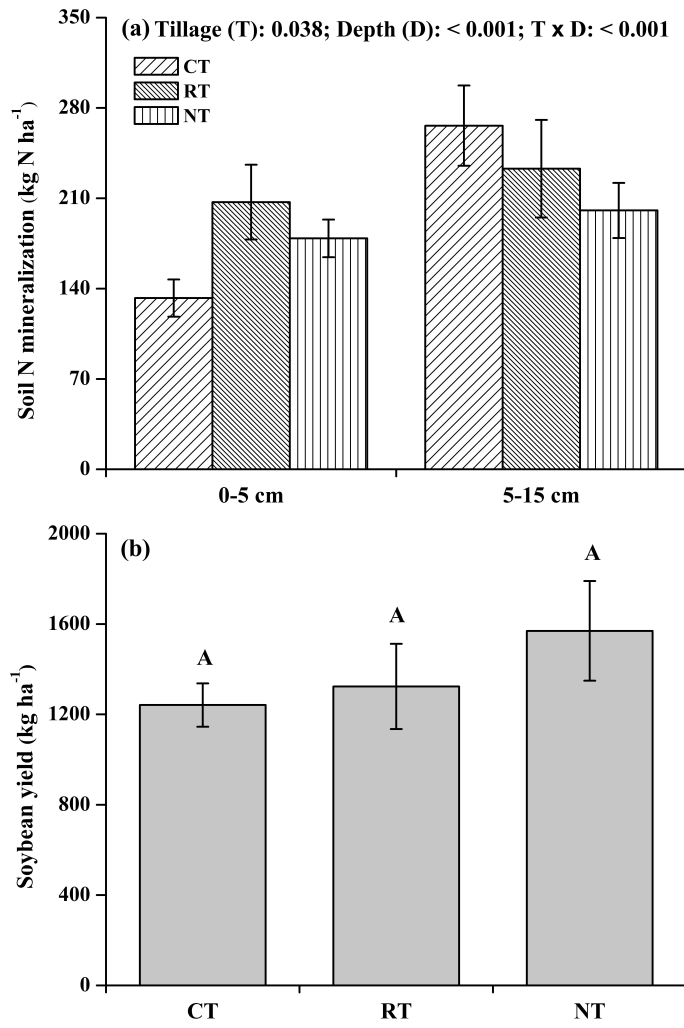

56

57 **Fig. S1** Soil N mineralization (SNM) during soybean growing season (a) and soybean  
 58 yield (b) under different tillage practices (mean  $\pm$  standard error). Tillage practices  
 59 capped by the same uppercase letter are not significantly different ( $P > 0.05$ ). CT,  
 60 conventional tillage; RT, ridge tillage; NT, no tillage.



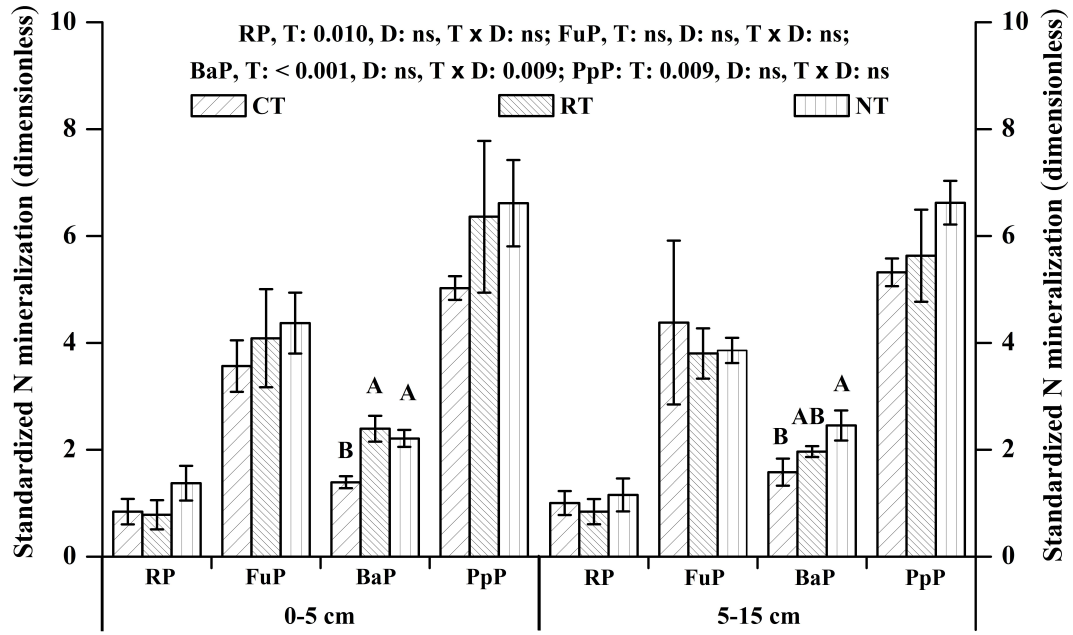

61

62 **Fig. S2** Contribution of energy pathways to N mineralization based on standardization

63 under different tillage practices (mean  $\pm$  standard error) at 0–5 (a) and 5–15 (b) cm

64 depths during soybean growing season. For the same energy pathway at each soil

65 depth, tillage practices capped by the same uppercase letter are not significantly

66 different ( $P > 0.05$ ). RP, root pathway; FuP, fungal pathway; BaP, bacterial pathway;

67 PpP, predator-prey pathway.

68

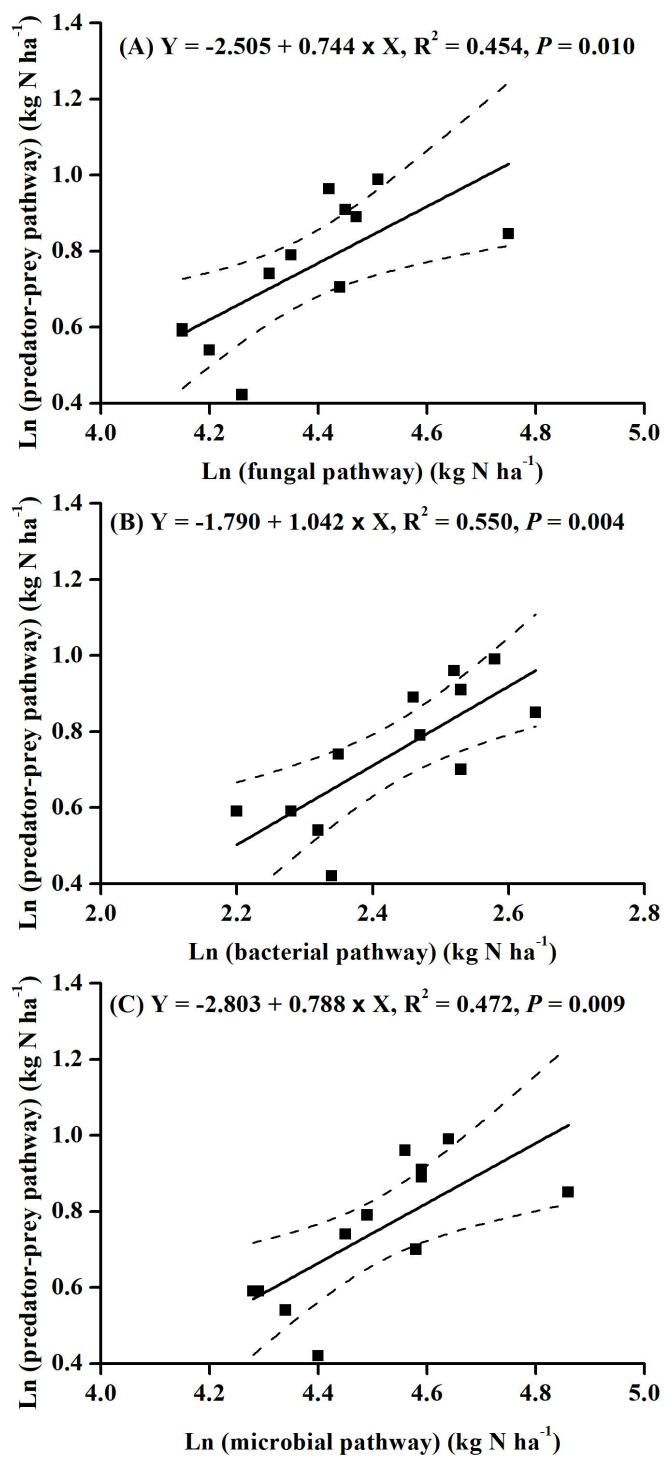

70

71 **Fig. S3** Linear relationship between bacterial, fungal and microbial (bacterial + fungal)  
 72 pathway and predator-prey pathway in N mineralization (kg ha<sup>-1</sup>) in the plough layer  
 73 (0–15 cm) during the soybean growing season. The dashed lines show the 95%  
 74 confidence intervals of mean prediction for the regression line.
